# Supplementary material
Source: PubMed Central journal article supplement (PMC5460713)
Supplement: CJN.10981016SupplementaryData.pdf [file CJN.10981016SupplementaryData.pdf]

**Supplementary table 1. HA-AKI occurrence according the KDIGO CKD stages.** Kidney disease improving global outcomes (KDIGO): KDIGO Stage 5-eGFR<15ml/min/1.73m<sup>2</sup>; KDIGO Stage 4-eGFR: 15-29ml/min/1.73m<sup>2</sup>; KDIGO Stage 3-eGFR: 30-59 ml/min/1.73m<sup>2</sup>; KDIGO Stage 2-eGFR: 60-89ml/min/1.73m<sup>2</sup>; KDIGO Stage 1-eGFR>90ml/min/1.73m<sup>2</sup>. ORs were calculated with contingency tables using KDIGO-CKD stages 1+2 as reference.

| <b>CKD stages</b> | <b>No HA-AKI</b> | <b>HA-AKI</b> | <b>Odds Ratio (95%CI)</b> |
|-------------------|------------------|---------------|---------------------------|
| <b>5</b>          | 1558 (1.5)       | 1118 (13)     | 18.6 (17.1-20.2)          |
| <b>4</b>          | 4311 (3.5)       | 1180 (14)     | 18.2 (16.5-20)            |
| <b>3</b>          | 20842 (17.5)     | 2668 (31)     | 3.3 (3.1-3.5)             |
| <b>1+2</b>        | 91119 (77)       | 3513 (41)     | 1                         |

## Supplementary table 2. ICD-10 diagnoses associated with HA-AKI

Occurrence indicates the number of times an ICD-10 diagnosis has been reported in the entire cohort (n=126.736 individuals). *P* value is calculated using the Fisher exact test with Bonferroni correction for multiple comparisons. Only the ICD10 codes associated with a *p* value < 3.3.10<sup>-5</sup> are shown (n=251). OR is calculated as follow: in the whole population. [(ICD10+/ICD10-) in patients with HA-AKI] divided by [(ICD10+/ICD10-) in patients without HA-AKI].

| Diagnosis | Name                                                                                                       | <i>p</i> value | Occurrence | OR   |
|-----------|------------------------------------------------------------------------------------------------------------|----------------|------------|------|
| I46       | Cardiac Arrest                                                                                             | 5E-330         | 1633       | 12.8 |
| I50       | Heart failure                                                                                              | 5E-330         | 8858       | 4.8  |
| J80       | Adult respiratory distress syndrome                                                                        | 5E-330         | 1281       | 16.8 |
| J96       | Respiratory failure                                                                                        | 5E-330         | 7672       | 6    |
| N17       | Acute kidney failure                                                                                       | 5E-330         | 5568       | 15.9 |
| N18       | Chronic kidney disease                                                                                     | 5E-330         | 8085       | 4.1  |
| R40       | Somnolence. stupor and coma                                                                                | 5E-330         | 1955       | 9    |
| R57       | Shock                                                                                                      | 5E-330         | 4777       | 14.4 |
| Z48       | Encounter for other postprocedural aftercare                                                               | 5E-330         | 10734      | 3.4  |
| Z99       | Dependence on enabling machines and devices                                                                | 5E-330         | 1800       | 9.1  |
| J15       | Bacterial pneumonia                                                                                        | 4.44E-323      | 4081       | 5.3  |
| Z09       | Encounter for follow-up examination after completed treatment for conditions other than malignant neoplasm | 4.81E-303      | 10460      | 0.1  |
| B96       | Other specified bacterial agents                                                                           | 4.83E-262      | 2871       | 5.6  |
| A41       | Other sepsis                                                                                               | 1.43E-256      | 1948       | 7.1  |
| I48       | Atrial fibrillation                                                                                        | 1.45E-249      | 9994       | 3    |
| T81       | Complications of procedures. not elsewhere classified                                                      | 2.73E-174      | 2681       | 4.5  |
| K72       | Hepatic failure                                                                                            | 3.43E-167      | 685        | 11.4 |
| I25       | Chronic ischemic heart disease                                                                             | 6.05E-166      | 14195      | 2.3  |
| B95       | Streptococcus and staphylococcus as the cause of diseases                                                  | 1.25E-164      | 1552       | 6    |
| I97       | Post procedural disorders of the circulatory system                                                        | 1.17E-149      | 937        | 8    |
| R58       | Hemorrhage. not elsewhere classified                                                                       | 2.23E-141      | 1031       | 7.1  |
| D62       | Acute post-hemorrhagic anemia                                                                              | 2.98E-137      | 1797       | 4.9  |
| I21       | Acute myocardial infarction                                                                                | 7.32E-127      | 2028       | 4.4  |
| I67       | Other cerebrovascular diseases                                                                             | 9.00E-127      | 5873       | 0.1  |
| N99       | Post-procedural disorders of the genitourinary system                                                      | 1.15E-122      | 295        | 20.2 |
| Z95       | Presence of cardiac and vascular implants and grafts                                                       | 1.66E-117      | 9247       | 2.3  |
| I42       | Dilated cardiomyopathy                                                                                     | 1.29E-112      | 3365       | 3.2  |
| Y95       | Nosocomial condition                                                                                       | 3.24E-112      | 512        | 10.3 |
| Z49       | Care involving dialysis                                                                                    | 3.48E-111      | 386        | 13.2 |
| G93       | Other disorders of the brain                                                                               | 1.37E-110      | 520        | 10   |
| J95       | Post-procedural respiratory disorders                                                                      | 4.98E-108      | 791        | 7.1  |
| R34       | Anuria/Oliguria                                                                                            | 1.90E-94       | 360        | 12   |
| I71       | Dissection of aorta                                                                                        | 9.91E-85       | 3295       | 2.9  |
| E87       | Hyperosmolality and hypernatremia                                                                          | 5.07E-84       | 4133       | 2.6  |
| Z82       | Family history of certain disabilities and chronic diseases (leading to disablement)                       | 2.44E-80       | 5419       | 0.2  |
| D69       | Purpura and other hemorrhagic conditions                                                                   | 1.38E-78       | 1013       | 4.9  |
| Z13       | Encounter for screening for other diseases and disorders                                                   | 1.27E-76       | 3104       | 0.1  |

|     |                                                                               |          |       |      |
|-----|-------------------------------------------------------------------------------|----------|-------|------|
| J18 | Bronchopneumonia                                                              | 2.63E-75 | 1886  | 3.4  |
| E10 | Type 1 diabetes mellitus with ketoacidosis without coma                       | 4.99E-75 | 2419  | 3.1  |
| C64 | Malignant neoplasm of kidney. except renal pelvis                             | 8.27E-72 | 824   | 5.2  |
| I35 | Nonrheumatic aortic valve disorders                                           | 8.55E-70 | 3618  | 2.6  |
| J69 | Pneumonitis due to solids and liquids                                         | 2.47E-69 | 918   | 4.8  |
| I31 | Other diseases of pericardium                                                 | 5.06E-68 | 939   | 4.7  |
| M62 | Separation of muscle                                                          | 4.01E-66 | 1231  | 4    |
| K65 | Peritonitis                                                                   | 7.51E-66 | 738   | 5.3  |
| R41 | Other symptoms and signs involving cognitive functions and awareness          | 8.67E-63 | 1096  | 4.1  |
| K55 | Vascular disorders of intestine                                               | 6.48E-61 | 717   | 5.1  |
| Z56 | Problems related to employment and unemployment                               | 1.26E-57 | 1957  | 0.1  |
| J81 | Complications of procedures                                                   | 2.19E-53 | 205   | 11.7 |
| J90 | Pleural effusion. not elsewhere classified                                    | 6.39E-51 | 1466  | 3.2  |
| I49 | Other cardiac arrhythmias                                                     | 1.16E-50 | 1906  | 2.9  |
| E78 | Pure hypercholesterolemia                                                     | 2.63E-50 | 25458 | 0.6  |
| R26 | Abnormalities of gait and mobility                                            | 4.10E-49 | 2088  | 2.7  |
| K92 | Hematemesis                                                                   | 7.71E-49 | 1520  | 3.1  |
| D65 | Disseminated intravascular coagulation                                        | 1.10E-48 | 217   | 10.2 |
| Z86 | Personal history of certain other diseases                                    | 1.59E-45 | 5743  | 0.4  |
| R39 | Other symptoms and signs involving the urinary system                         | 4.17E-45 | 205   | 10   |
| I70 | Atherosclerosis                                                               | 3.62E-43 | 13464 | 0.6  |
| Z94 | Transplanted organ and tissue status                                          | 4.72E-42 | 1432  | 3    |
| I44 | Atrioventricular block                                                        | 6.95E-42 | 1756  | 2.7  |
| I34 | Nonrheumatic mitral valve disorders                                           | 2.33E-41 | 2072  | 2.5  |
| A40 | Streptococcal sepsis                                                          | 5.83E-41 | 277   | 7.2  |
| L89 | Pressure ulcer                                                                | 2.83E-40 | 1036  | 3.3  |
| Z29 | Encounter for other prophylactic measures                                     | 6.52E-40 | 2476  | 2.4  |
| R73 | Elevated blood glucose level                                                  | 8.44E-40 | 1702  | 0.1  |
| T88 | Other complications of surgical and medical care                              | 1.11E-39 | 791   | 3.8  |
| T82 | Complications of cardiac and vascular prosthetic devices. implants and grafts | 2.39E-38 | 1137  | 3.1  |
| R65 | Systemic Inflammatory Response Syndrome                                       | 7.27E-38 | 441   | 5    |
| Z71 | Persons encountering health services for other counseling and medical advice  | 3.64E-37 | 2720  | 0.2  |
| I33 | Endocarditis                                                                  | 1.49E-36 | 406   | 5.2  |
| E43 | Unspecified severe protein-calorie malnutrition                               | 2.79E-36 | 2080  | 2.4  |
| R07 | Pain in throat and chest                                                      | 9.19E-34 | 5073  | 0.4  |
| E14 | Nondiabetic hypoglycemic coma                                                 | 2.19E-33 | 2793  | 2.1  |
| I47 | Ventricular arrhythmia                                                        | 8.22E-33 | 1712  | 2.5  |
| K56 | Ileus                                                                         | 4.51E-32 | 1530  | 2.6  |
| S72 | Fracture of femur                                                             | 1.27E-31 | 2025  | 2.3  |
| J13 | Pneumonia due to Streptococcus pneumoniae                                     | 2.14E-31 | 416   | 4.6  |
| S36 | Injury of intra-abdominal organs                                              | 2.71E-31 | 621   | 3.7  |
| Z92 | Personal history of medical treatment                                         | 2.69E-30 | 11651 | 1.5  |
| N30 | Cystitis                                                                      | 5.50E-29 | 488   | 4.1  |
| R45 | Symptoms and signs involving emotional state                                  | 6.16E-29 | 364   | 4.8  |
| I74 | Embolus of abdominal aorta                                                    | 2.13E-27 | 1928  | 2.2  |
| I13 | Hyp hrt & chr kdny dis w hrt fail and stg 1-4/unsp chr kdny                   | 3.32E-27 | 1334  | 2.5  |
| S27 | Injury of other and unspecified intrathoracic organs                          | 7.94E-27 | 1182  | 2.6  |

|     |                                                                  |          |       |      |
|-----|------------------------------------------------------------------|----------|-------|------|
| I08 | Multiple valves disease                                          | 8.25E-27 | 424   | 4.2  |
| K26 | Duodenal ulcer                                                   | 4.14E-26 | 373   | 4.4  |
| J85 | Abscess of lung and mediastinum                                  | 4.80E-25 | 245   | 5.5  |
| B23 | Imaging > Heart > Magnetic Resonance Imaging (MRI)               | 1.45E-24 | 1231  | 0.1  |
| K25 | Acute gastric ulcer                                              | 1.66E-24 | 684   | 3.2  |
| J98 | Other respiratory disorders                                      | 5.24E-24 | 607   | 3.3  |
| T79 | Certain early complications of trauma. not elsewhere classified  | 7.34E-24 | 290   | 4.8  |
| I36 | Nonrheumatic tricuspid valve disorders                           | 1.25E-23 | 418   | 3.9  |
| Z04 | Encounter for examination and observation for other reasons      | 2.86E-23 | 1957  | 0.3  |
| S35 | Injury of blood vessels at abdomen. lower back and pelvis level  | 4.22E-23 | 138   | 7.7  |
| I63 | Cerebral infarction                                              | 7.84E-23 | 912   | 2.7  |
| R33 | Retention of urine                                               | 1.14E-22 | 1094  | 2.5  |
| B37 | Candidiasis                                                      | 1.62E-22 | 297   | 4.6  |
| Y83 | Txplt of whole organ cause abn react/compl. w/o misadvnt         | 1.61E-21 | 407   | 3.8  |
| J14 | Pneumonia due to Haemophilus influenzae                          | 2.75E-21 | 226   | 5.2  |
| E26 | Hyperaldosteronism                                               | 1.07E-20 | 1180  | 0.2  |
| T68 | Hypothermia                                                      | 5.83E-20 | 87    | 9.9  |
| R93 | Abnormal findings on diagnostic imaging of other body structures | 2.71E-19 | 853   | 0.1  |
| I10 | Essential (primary) hypertension                                 | 3.36E-19 | 34103 | 1.2  |
| S32 | Fracture of lumbar spine and pelvis                              | 1.22E-18 | 962   | 2.4  |
| E86 | Dehydration                                                      | 1.36E-18 | 633   | 2.9  |
| R68 | Other general symptoms and signs                                 | 1.42E-18 | 79    | 10.1 |
| N39 | Other disorders of urinary system                                | 5.62E-18 | 1229  | 2.2  |
| R56 | Convulsions                                                      | 6.74E-18 | 338   | 3.7  |
| Z74 | Problems related to care provider dependency                     | 1.88E-17 | 1284  | 2.2  |
| R18 | Ascites                                                          | 2.89E-17 | 596   | 2.8  |
| I27 | Other pulmonary heart diseases                                   | 3.41E-17 | 859   | 2.5  |
| J44 | Chronic obstructive pulmon disease                               | 3.69E-17 | 2337  | 1.8  |
| C90 | Multiple myeloma not having achieved remission                   | 4.33E-17 | 294   | 3.9  |
| I20 | Unstable angina                                                  | 4.82E-17 | 4669  | 1.6  |
| F00 |                                                                  | 5.39E-17 | 1320  | 2.1  |
| I51 | Complications and ill-defined descriptions of heart disease      | 1.09E-16 | 439   | 3.2  |
| E21 | Hyperparathyroidism and other disorders of parathyroid gland     | 3.02E-16 | 1092  | 0.2  |
| S37 | Injury of urinary and pelvic organs                              | 5.86E-16 | 270   | 3.9  |
| E44 | Moderate protein-calorie malnutrition                            | 1.21E-15 | 1869  | 1.9  |
| S06 | Intracranial injury                                              | 1.38E-15 | 859   | 2.4  |
| N10 | Acute tubulo-interstitial nephritis                              | 2.25E-15 | 1279  | 2.1  |
| R94 | Abnormal results of function studies                             | 3.56E-15 | 585   | 0.1  |
| N20 | Calculus of kidney and ureter                                    | 7.06E-15 | 1747  | 0.4  |
| F03 | Unspecified dementia                                             | 9.48E-15 | 875   | 2.3  |
| E04 | Other nontoxic goiter                                            | 1.12E-14 | 1024  | 0.2  |
| E66 | Morbid (severe) obesity due to excess calories                   | 1.27E-14 | 12203 | 0.7  |
| R17 | Unspecified jaundice                                             | 2.30E-14 | 252   | 3.8  |
| I61 | Nontraumatic intrcbl hemorrhage hemisphere. subcortical          | 2.53E-14 | 359   | 3.2  |
| D35 | Benign neoplasm of other and unspecified endocrine glands        | 2.90E-14 | 1002  | 0.2  |
| G81 | Flaccid hemiplegia affecting unspecified side                    | 4.20E-14 | 557   | 2.7  |
| N41 | Inflammatory diseases of prostate                                | 4.20E-14 | 768   | 2.4  |

|     |                                                                     |          |      |     |
|-----|---------------------------------------------------------------------|----------|------|-----|
| N13 | Obstructive and reflux uropathy                                     | 4.43E-14 | 558  | 2.7 |
| D70 | Agranulocytosis                                                     | 8.64E-14 | 162  | 4.8 |
| D61 | Constitutional (pure) red blood cell aplasia                        | 1.33E-13 | 380  | 3.1 |
| F05 | Delirium due to known physiological condition                       | 2.53E-13 | 333  | 3.2 |
| E83 | Disorder of copper metabolism. unspecified                          | 3.26E-13 | 1568 | 0.4 |
| T86 | Failure and rejection of transplanted organs and tissues            | 3.27E-13 | 120  | 5.5 |
| G41 | Status epilepticus                                                  | 4.75E-13 | 192  | 4.2 |
| J94 | Chylous effusion                                                    | 5.27E-13 | 231  | 3.8 |
| E41 | Nutritional marasmus                                                | 1.41E-12 | 801  | 2.2 |
| S22 | Fracture of rib(s). sternum and thoracic spine                      | 1.99E-12 | 1015 | 2.1 |
| I23 | Certain current complications following acute myocardial infarction | 2.21E-12 | 77   | 7.2 |
| D64 | Hereditary sideroblastic anemia                                     | 3.08E-12 | 1348 | 1.9 |
| N19 | Unspecified kidney failure                                          | 5.06E-12 | 138  | 4.8 |
| Z43 | Encounter for attention to artificial openings                      | 1.04E-11 | 716  | 2.3 |
| K70 | Alcoholic liver disease                                             | 1.24E-11 | 769  | 2.2 |
| A48 | Other bacterial diseases. not elsewhere classified                  | 1.58E-11 | 102  | 5.6 |
| R99 | Other ill-defined and unspecified causes of mortality               | 4.02E-11 | 99   | 5.5 |
| Z51 | Encounter for other aftercare and medical care                      | 7.51E-11 | 6501 | 1.4 |
| T65 | Toxic effect of other and unspecified substance                     | 9.37E-11 | 1365 | 1.8 |
| R80 | Proteinuria                                                         | 1.15E-10 | 596  | 0.2 |
| S26 | Injury of heart                                                     | 1.17E-10 | 90   | 5.7 |
| M96 | Post-procedural musculoskeletal disorders. not elsewhere classified | 1.31E-10 | 84   | 5.9 |
| R03 | Abnormal blood-pressure reading. without diagnosis                  | 1.33E-10 | 502  | 0.1 |
| B34 | Adenovirus infection. unspecified                                   | 1.94E-10 | 359  | 2.8 |
| C61 | Malignant neoplasm of prostate                                      | 2.10E-10 | 1468 | 1.8 |
| N08 | Glomerular disorders in diseases classified elsewhere               | 2.44E-10 | 747  | 2.1 |
| M81 | Osteoporosis without current pathological fracture                  | 2.75E-10 | 753  | 0.2 |
| G82 | Paraplegia. unspecified                                             | 4.54E-10 | 268  | 3.1 |
| T46 | Poisoning by agents primarily affecting the cardiovascular system   | 5.33E-10 | 42   | 9.5 |
| D50 | Iron deficiency anemia secondary to blood loss (chronic)            | 5.37E-10 | 2184 | 1.6 |
| Z83 | Family history of other specific disorders                          | 8.81E-10 | 590  | 0.2 |
| A04 | Enteropathogenic Escherichia coli infection                         | 1.32E-09 | 330  | 2.7 |
| R64 | Cachexia                                                            | 2.07E-09 | 438  | 2.4 |
| E11 | Type 2 diab w hyposm w/o nonket hyprgly-hypros coma (NKHHC)         | 2.12E-09 | 7756 | 1.3 |
| Z45 | Encounter for adjustment and management of implanted device         | 2.67E-09 | 1698 | 1.7 |
| R98 | Unattended death                                                    | 2.94E-09 | 76   | 5.7 |
| I24 | Other acute ischemic heart diseases                                 | 3.01E-09 | 309  | 2.8 |
| T45 | Poisoning                                                           | 4.31E-09 | 313  | 2.7 |
| K85 | IPancreatitis                                                       | 4.51E-09 | 679  | 2.1 |
| M72 | Fibroblastic disorders                                              | 6.53E-09 | 79   | 5.4 |
| I11 | Hypertensive heart disease with heart failure                       | 7.86E-09 | 3340 | 1.4 |
| E84 | Cystic fibrosis with pulmonary manifestations                       | 8.51E-09 | 212  | 3.2 |
| K66 | Peritoneal adhesions                                                | 1.05E-08 | 188  | 3.3 |
| C78 | Secondary malignant neoplasm of unspecified lung                    | 1.29E-08 | 3026 | 1.5 |
| R04 | Hemorrhage from respiratory passages                                | 1.31E-08 | 938  | 1.9 |
| J10 | Influenza with pneumonia. seasonal influenza virus identified       | 1.43E-08 | 89   | 4.9 |
| R00 | Abnormalities of heart beat                                         | 1.43E-08 | 1599 | 0.5 |

|     |                                                                                   |          |      |      |
|-----|-----------------------------------------------------------------------------------|----------|------|------|
| R51 | Headache                                                                          | 1.45E-08 | 482  | 0.2  |
| D59 | Drug-induced autoimmune hemolytic anemia                                          | 2.77E-08 | 145  | 3.7  |
| K63 | Other diseases of intestine                                                       | 2.97E-08 | 795  | 1.9  |
| Q61 | Cystic kidney disease                                                             | 4.03E-08 | 189  | 3.2  |
| G97 | Postprocedural disorders of nervous system. not elsewhere classified              | 4.46E-08 | 80   | 5    |
| K91 | Intraoperative and postprocedural complications and disorders of digestive system | 4.66E-08 | 257  | 2.8  |
| F99 | Mental disorder. not otherwise specified                                          | 8.29E-08 | 56   | 6.1  |
| Z93 | Artificial opening status                                                         | 9.34E-08 | 442  | 2.2  |
| C65 | Malignant neoplasm of renal pelvis                                                | 3.38E-07 | 31   | 8.9  |
| D25 | Leiomyoma of uterus                                                               | 3.96E-07 | 452  | 0.2  |
| S33 | Dislocation. sprain and strain of joints and ligaments of lumbar spine            | 4.11E-07 | 37   | 7.6  |
| N11 | Chronic tubulo-interstitial nephritis                                             | 4.49E-07 | 308  | 2.5  |
| F17 | Nicotine dependence                                                               | 4.66E-07 | 9595 | 0.8  |
| R09 | Other symptoms and signs involving the circulatory and respiratory system         | 5.29E-07 | 131  | 3.5  |
| B24 | Ultrasonography                                                                   | 5.43E-07 | 413  | 2.2  |
| I73 | Raynaud's syndrome                                                                | 9.17E-07 | 613  | 0.3  |
| Z46 | Encounter for fitting and adjustment of other devices                             | 1.02E-06 | 95   | 4    |
| I05 | Rheumatic mitral stenosis                                                         | 1.10E-06 | 526  | 2    |
| G20 | Parkinson's disease                                                               | 1.11E-06 | 453  | 2.1  |
| S25 | Injury of blood vessels of thorax                                                 | 1.15E-06 | 88   | 4.1  |
| J41 | Chronic bronchitis                                                                | 1.16E-06 | 454  | 2.1  |
| D63 | Anemia in neoplastic disease                                                      | 1.26E-06 | 954  | 1.7  |
| X70 | Intentional self-harm by hanging, strangulation and suffocation                   | 1.33E-06 | 19   | 12.6 |
| R60 | Edema                                                                             | 1.38E-06 | 463  | 2.1  |
| I22 | Subsequent myocardial infarction                                                  | 1.39E-06 | 60   | 5.1  |
| A49 | Bacterial infection. unspecified                                                  | 1.53E-06 | 182  | 2.9  |
| Y69 | Unspecified misadventure during surgical and medical care                         | 1.55E-06 | 35   | 7.3  |
| K35 | Acute appendicitis                                                                | 1.80E-06 | 782  | 0.4  |
| K90 | Intestinal malabsorption                                                          | 2.62E-06 | 365  | 0.2  |
| K81 | Cholecystitis                                                                     | 3.08E-06 | 371  | 2.2  |
| G31 | Malignant neuroleptic syndrome                                                    | 3.44E-06 | 425  | 2.1  |
| C50 | Malignant neoplasm of the breast                                                  | 3.67E-06 | 1722 | 0.6  |
| Y57 | Other and unspecified drugs and medicaments                                       | 6.64E-06 | 46   | 5.5  |
| K50 | Crohn's disease                                                                   | 6.81E-06 | 548  | 0.3  |
| I26 | Pulmonary embolism                                                                | 7.53E-06 | 2474 | 1.4  |
| E85 | Non-neuropathic hereditary familial amyloidosis                                   | 7.56E-06 | 107  | 3.4  |
| H35 | Unspecified background retinopathy                                                | 7.68E-06 | 1000 | 0.5  |
| Z52 | Donors of organs and tissues                                                      | 8.68E-06 | 196  | 2.6  |
| I60 | Nontraumatic subarachnoid hemorrhage                                              | 9.19E-06 | 134  | 3.1  |
| E05 | Thyrotoxicosis with diffuse goiter without thyrotoxic crisis                      | 9.27E-06 | 852  | 0.5  |
| K76 | Other diseases of liver                                                           | 9.48E-06 | 293  | 2.3  |
| R91 | Abnormal findings on diagnostic imaging of lung                                   | 9.48E-06 | 566  | 0.4  |
| T84 | Complications of internal orthopedic prosthetic devices, implants and grafts      | 9.82E-06 | 306  | 2.2  |
| R53 | Malaise and fatigue                                                               | 1.07E-05 | 4581 | 1.3  |
| T80 | Complications following infusion, transfusion and therapeutic injection           | 1.32E-05 | 128  | 3.1  |
| L02 | Cutaneous abscess of face                                                         | 1.42E-05 | 480  | 1.9  |
| S42 | Fracture of shoulder and upper arm                                                | 1.45E-05 | 863  | 1.7  |

|     |                                                                                   |          |      |      |
|-----|-----------------------------------------------------------------------------------|----------|------|------|
| T83 | Complications of genitourinary prosthetic devices, implants and grafts            | 1.58E-05 | 112  | 3.2  |
| I82 | Other venous embolism and thrombosis                                              | 1.63E-05 | 322  | 2.2  |
| E13 | Oth diab w hyprosm w/o nonket hyprgly-hypros coma (NKHHC)                         | 1.71E-05 | 157  | 2.8  |
| J86 | Pyothorax                                                                         | 1.80E-05 | 233  | 2.4  |
| C66 | Malignant neoplasm of ureter                                                      | 2.17E-05 | 58   | 4.5  |
| D12 | Benign neoplasm of cecum                                                          | 2.19E-05 | 525  | 0.4  |
| I06 | Rheumatic aortic stenosis                                                         | 2.30E-05 | 388  | 2    |
| S12 | Fracture of cervical vertebra and other parts of neck                             | 2.38E-05 | 242  | 2.4  |
| L98 | Pyogenic granuloma                                                                | 2.55E-05 | 74   | 3.9  |
| C67 | Malignant neoplasm of trigone of bladder                                          | 2.74E-05 | 808  | 1.7  |
| J38 | Paralysis of vocal cords and larynx                                               | 2.77E-05 | 307  | 2.2  |
| Z63 | Other problems related to primary support group                                   | 2.88E-05 | 497  | 0.3  |
| S48 | Traumatic amputation of shoulder and upper arm                                    | 3.08E-05 | 11   | 16.7 |
| Q79 | Congenital malformations of musculoskeletal system                                | 3.15E-05 | 260  | 0.2  |
| I07 | Rheumatic tricuspid stenosis                                                      | 3.24E-05 | 100  | 3.3  |
| E79 | Hyperuricemia w/o signs of inflam arthrit and tophaceous dis                      | 3.71E-05 | 369  | 0.3  |
| F01 | Vascular dementia                                                                 | 4.28E-05 | 453  | 1.9  |
| I85 | Esophageal varices                                                                | 4.47E-05 | 147  | 2.7  |
| D46 | Refractory anemia without ring sideroblasts. so stated                            | 4.87E-05 | 274  | 2.2  |
| E16 | Drug-induced hypoglycemia without coma                                            | 6.62E-05 | 132  | 2.8  |
| J91 | Pleural effusion                                                                  | 7.12E-05 | 340  | 2    |
| Z75 | Problems related to medical facilities and other health care                      | 8.97E-05 | 2207 | 1.4  |
| Z03 | Encounter for medical observation for suspected diseases and conditions ruled out | 9.39E-05 | 868  | 0.5  |
| N04 | Nephrotic syndrome                                                                | 9.45E-05 | 475  | 1.8  |
| N28 | Other disorders of kidney and ureter                                              | 9.67E-05 | 454  | 1.9  |
| Y40 | Dx and monitoring gen hosp/persnl-use devices assoc w incdt                       | 9.99E-05 | 66   | 3.8  |

### Supplementary table 3. ICD-10 diagnosis negatively associated with HA-AKI

Occurrence indicates the number of times an ICD-10 diagnosis has been reported in the entire cohort (n=126.736 individuals). OR is calculated as follow: in the whole population. [(ICD10+/ICD10-) in patients with HA-AKI] divided by [(ICD10+/ICD10-) in patients without HA-AKI]. P value is calculated using the Fisher exact test with Bonferroni correction for multiple comparisons. Only the diagnosis associated with a p value <  $3.3 \cdot 10^{-5}$  and > 0.25 are shown.

| ICD-10 | Diagnosis                                                                            | Occurrences | P Value   | OR   |
|--------|--------------------------------------------------------------------------------------|-------------|-----------|------|
| Z09    | Encounter for follow-up examination                                                  | 10460       | 4.81E-303 | 0.01 |
| I67    | Other cerebrovascular diseases                                                       | 5873        | 9.00E-127 | 0.08 |
| Z82    | Family history of certain disabilities and chronic diseases (leading to disablement) | 5419        | 2.44E-80  | 0.19 |
| Z13    | Encounter for screening for other diseases and disorders                             | 3104        | 1.27E-76  | 0.05 |
| Z56    | Problems related to employment and unemployment                                      | 1957        | 1.26E-57  | 0.01 |
| R73    | Elevated blood glucose level                                                         | 1702        | 8.44E-40  | 0.07 |
| Z71    | Persons encountering health services for other counseling and medical advice         | 2720        | 3.64E-37  | 0.22 |
| B23    | Imaging > Heart > Magnetic Resonance Imaging (MRI)                                   | 1231        | 1.45E-24  | 0.12 |
| E26    | Hyperaldosteronism                                                                   | 1180        | 1.07E-20  | 0.16 |
| R93    | Abnormal findings on diagnostic imaging of other body structures                     | 853         | 2.71E-19  | 0.08 |
| E21    | Hyperparathyroidism and other disorders of parathyroid gland                         | 1092        | 3.02E-16  | 0.21 |
| R94    | Abnormal results of function studies                                                 | 585         | 3.56E-15  | 0.05 |
| E04    | Other nontoxic goiter                                                                | 1024        | 1.12E-14  | 0.22 |
| D35    | Benign neoplasm of other and unspecified endocrine glands                            | 1002        | 2.90E-14  | 0.23 |
| R80    | Proteinuria                                                                          | 596         | 1.15E-10  | 0.17 |
| R03    | Abnormal blood-pressure reading. without diagnosis                                   | 502         | 1.33E-10  | 0.12 |
| M81    | Osteoporosis without current pathological fracture                                   | 753         | 2.75E-10  | 0.25 |
| Z83    | Family history of other specific disorders                                           | 590         | 8.81E-10  | 0.19 |
| R51    | Headache                                                                             | 482         | 1.45E-08  | 0.18 |
| D25    | Leiomyoma of uterus                                                                  | 452         | 3.96E-07  | 0.22 |
| K90    | Intestinal malabsorption                                                             | 365         | 2.62E-06  | 0.2  |
| Q79    | Congenital malformations of musculoskeletal system                                   | 260         | 3.15E-05  | 0.17 |



# Supplementary figure 1

Scatter (volcano) plot of the 251 ICD-10 diagnoses associated with HA-AKI ( $p < 3.3 \cdot 10^{-5}$ ) according to their log transformed p values and ORs. Red dots denote diagnoses associated with  $p < 3.3 \cdot 10^{-5}$  and  $OR > 4$ , and listed in the Table 2.

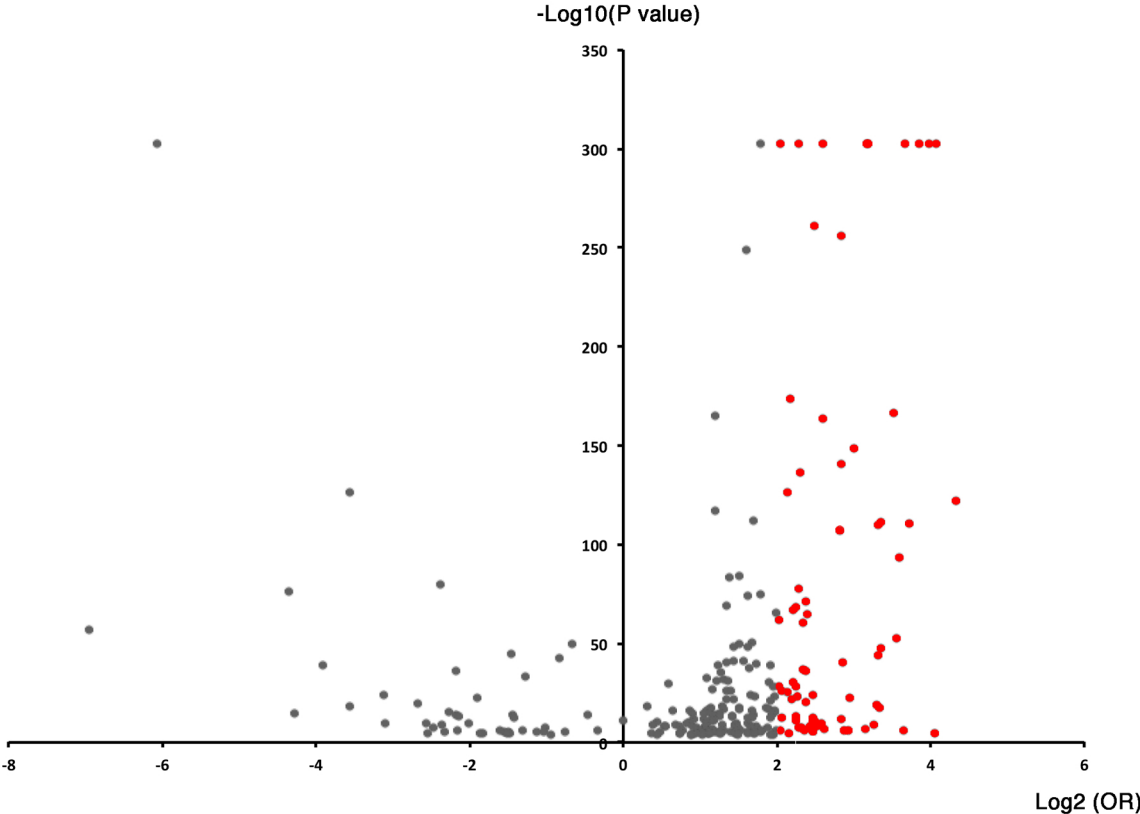

## Supplementary figure 2

Assuming none of these 98 735 excluded patients had HA-AKI, we calculated the ORs for 251 ICD-10 diagnoses in the entire population and compared them with those found in the population made of 126,736 patients in which AKI has been evaluated . Overall, the levels of the associations between the 2 populations were well correlated, and a minimal bias was observed. Only 6 associations lost their significance: C61/Malignant neoplasm of the prostate; J38/Disease of vocal cord of larynx; L02/Cutaneous abscess; M72/Fibroblastic disorders; Z51/Encounter for other medical care; and Z52/Donors of organs.

Linear correlation plots between p values of the association of ICD10 codes with HA-AKI in the population in which AKI has been estimated with 2 plasma creatinine measurements, and the whole population admitted to the hospital during 2006 and 2015.

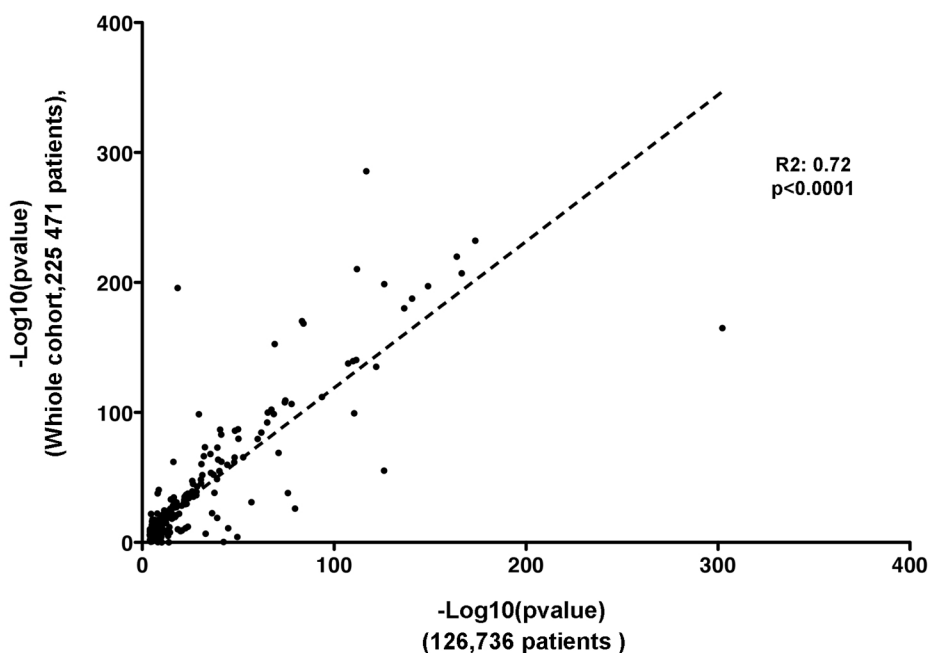

Bland-Altman plots of the Odds Ratio of the association of ICD10 codes with HA-AKI in the population in which AKI has been estimated with 2 plasma creatinine measurements, and the whole population admitted to the hospital during 2006 and 2015.

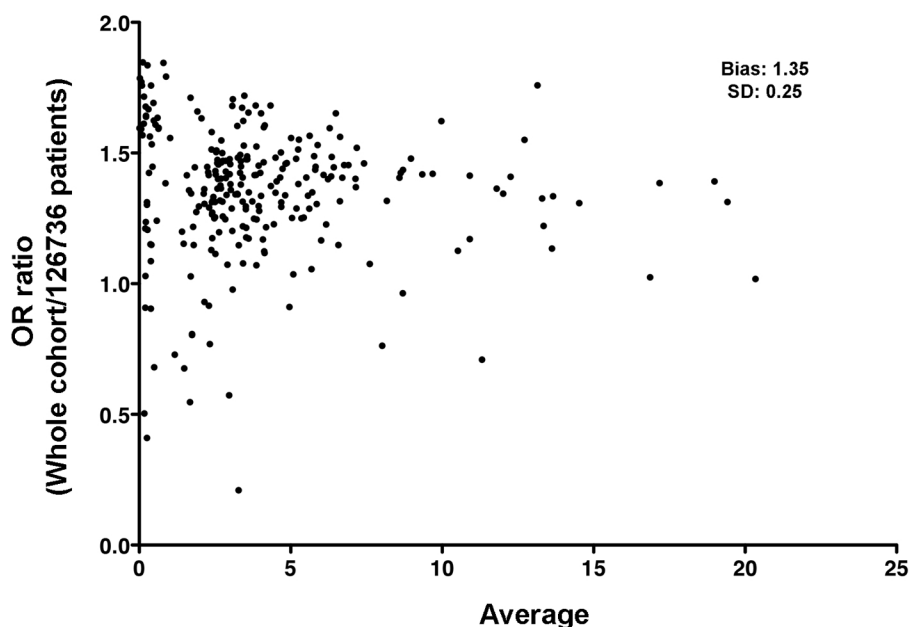

**FIGURE 3**

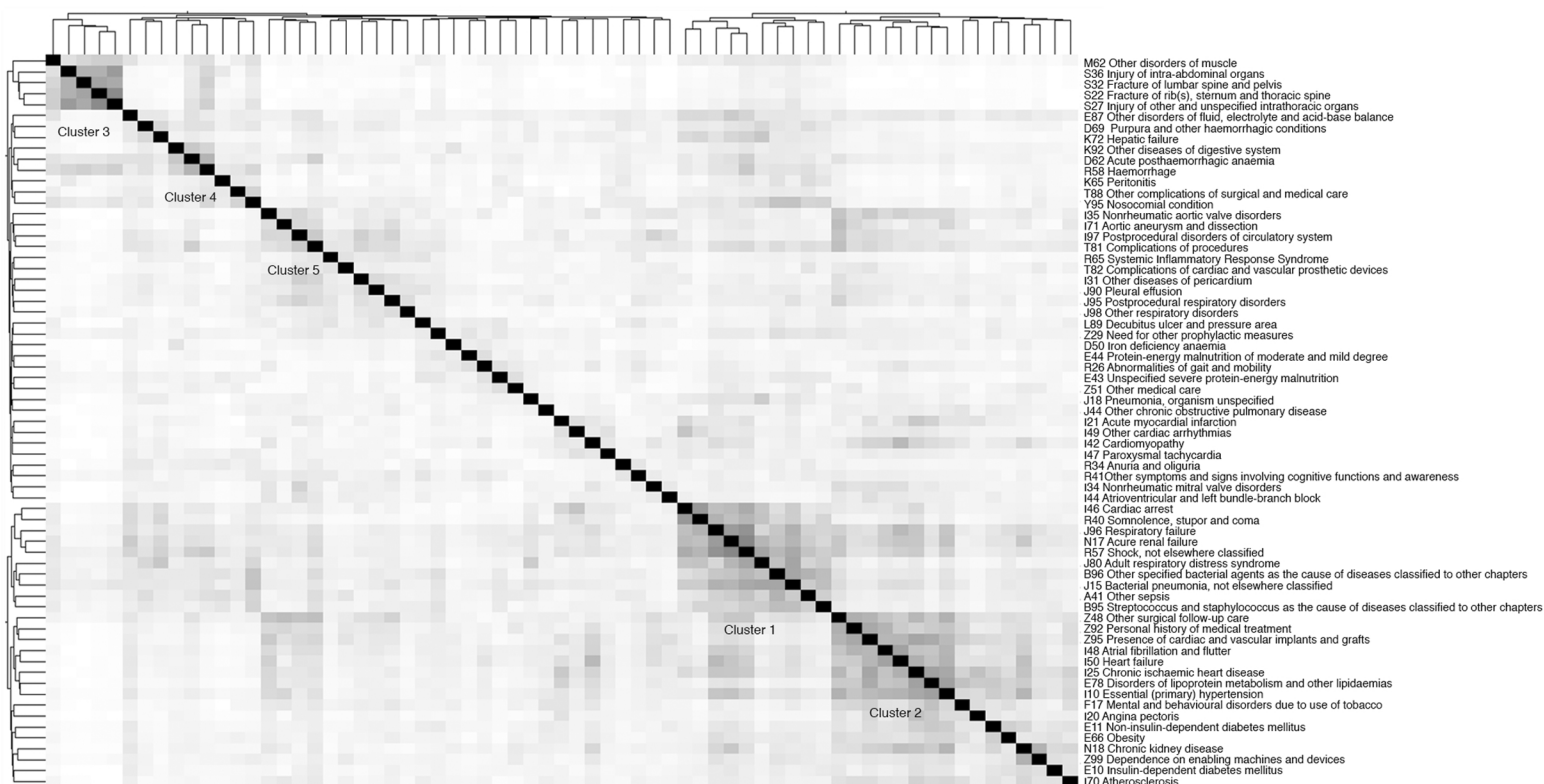

- M62 Other disorders of muscle
- S36 Injury of intra-abdominal organs
- S32 Fracture of lumbar spine and pelvis
- S22 Fracture of rib(s), sternum and thoracic spine
- S27 Injury of other and unspecified intrathoracic organs
- E87 Other disorders of fluid, electrolyte and acid-base balance
- D69 Purpura and other haemorrhagic conditions
- K72 Hepatic failure
- K92 Other diseases of digestive system
- D62 Acute posthaemorrhagic anaemia
- R58 Haemorrhage
- K65 Peritonitis
- T88 Other complications of surgical and medical care
- Y95 Nosocomial condition
- I35 Nonrheumatic aortic valve disorders
- I71 Aortic aneurysm and dissection
- I97 Postprocedural disorders of circulatory system
- T81 Complications of procedures
- R65 Systemic Inflammatory Response Syndrome
- T82 Complications of cardiac and vascular prosthetic devices
- I31 Other diseases of pericardium
- J90 Pleural effusion
- J95 Postprocedural respiratory disorders
- J98 Other respiratory disorders
- L89 Decubitus ulcer and pressure area
- Z93 Need for other prophylactic measures
- D50 Iron deficiency anaemia
- E44 Protein-energy malnutrition of moderate and mild degree
- E25 Abnormalities of gait and mobility
- E43 Unspecified severe protein-energy malnutrition
- Z51 Other medical care
- J19 Pneumonia, organism unspecified
- J44 Other chronic obstructive pulmonary disease
- I21 Acute myocardial infarction
- I49 Other cardiac arrhythmias
- I42 Cardiomyopathy
- I47 Paroxysmal tachycardia
- R34 Anuria and oliguria
- R41 Other symptoms and signs involving cognitive functions and awareness
- I34 Nonrheumatic mitral valve disorders
- I44 Anterior and left bundle-branch block
- I46 Cardiac arrest
- R40 Somnolence, stupor and coma
- J96 Respiratory failure
- N17 Acute renal failure
- R57 Shock, not elsewhere classified
- J80 Adult respiratory distress syndrome
- B96 Other specified bacterial agents as the cause of diseases classified to other chapters
- J15 Bacterial pneumonia, not elsewhere classified
- A41 Other sepsis
- B95 Streptococcus and staphylococcus as the cause of diseases classified to other chapters
- Z48 Other surgical follow-up care
- Z92 Personal history of medical treatment
- Z95 Presence of cardiac and vascular implants and grafts
- I48 Atrial fibrillation and flutter
- I50 Heart failure
- I25 Chronic ischaemic heart disease
- E78 Disorders of lipoprotein metabolism and other lipidaemias
- I10 Essential (primary) hypertension
- F17 Mental and behavioural disorders due to use of tobacco
- E11 Non-insulin-dependent diabetes mellitus
- E98 Obesity
- N18 Chronic kidney disease
- Z99 Dependence on enabling machines and devices
- E10 Insulin-dependent diabetes mellitus
- I70 Atherosclerosis

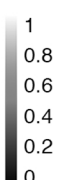

**Cluster 1:**

- I46/Cardiac arrest
- R40/Somnolence, stupor and coma
- J96/Respiratory failure
- N17/Acute renal failure
- R57/Shock
- J80/Adult respiratory distress syndrome
- B96/Other specified bacterial agents as the cause of diseases
- J15/Bacterial pneumonia
- A41/Other sepsis
- B95/Streptococcus and staphylococcus as the cause of diseases

**Cluster 2**

- Z48/Other surgical follow-up care
- Z92/Personal history of medical treatment
- Z95/Presence of cardiac and vascular implants and grafts
- I48/Atrial fibrillation and flutter
- I50/Heart failure
- I25/Chronic ischaemic heart disease
- E78/Disorders of lipoprotein metabolism
- I10/Essential hypertension

**Cluster 3**

- M62/Other disorders of muscle
- S36/Injury of intra-abdominal organs
- S32/Fracture of lumbar spine and pelvis
- S22/Fracture of rib(s), sternum and thoracic spine
- S27/Injury of intrathoracic organs

**Cluster 4**

- K72/Hepatic failure
- K92/Other diseases of digestive system
- D62/Acute posthemorrhagic anemia

**Cluster 5**

- I35/Nonrheumatic aortic valve disorders
- I71/Aortic aneurysm and dissection
- I97/Postprocedural disorders of circulatory system
- T81/Complications of procedures
